# Supplementary material for: A within-host infection model to explore tolerance and resistance
Source: eLife. 2025 Feb 13;14:e104052. doi: 10.7554/eLife.104052 (PMC12143882; doi:10.7554/eLife.104052)
Supplement: Appendix 7—figure 1—source data 1. [file elife-104052-app7-fig1-data1.xlsx]

## Sheet: Sheet1
Dilution	Volume (muL) bact. suspension / PBS	Number of plate replicates
10	10/90	1
100	10/90	0
1,000	10/90	1
5,000	40/160	2
25,000	40/160	4
125,000	40/160	4
625,000	40/160	4
1,250,000	50/50	2
