# Supplementary material for: A within-host infection model to explore tolerance and resistance
Source: eLife journal article supplement (doi:10.7554/elife.104052), 2025-02-13
Supplement: supp [file elife-104052-supp-v1.zip]

# Weibull distribution shape

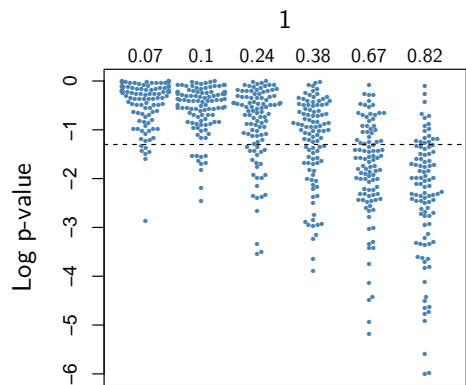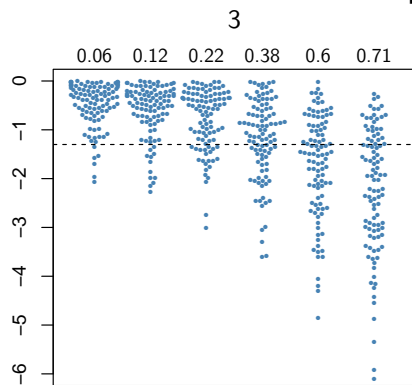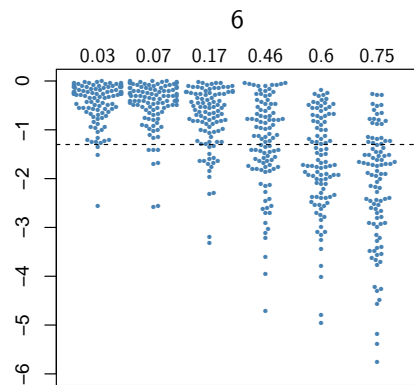

outliers not removed

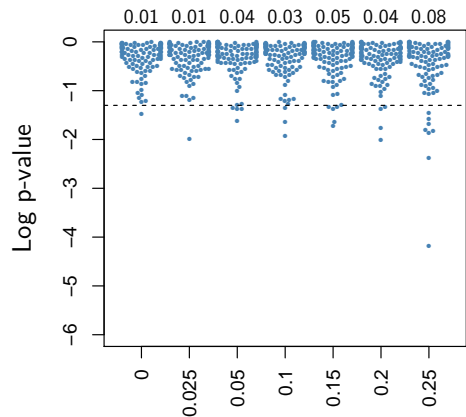

Proportion not killed by infection

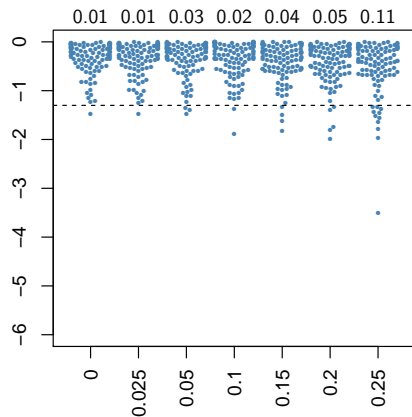

Proportion not killed by infection

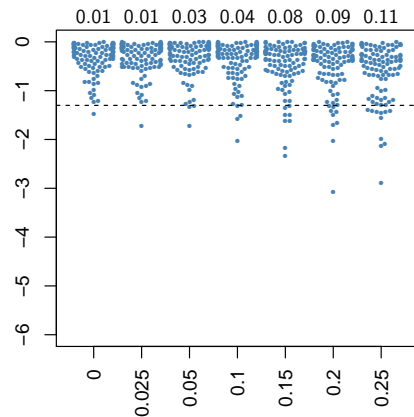

Proportion not killed by infection

outliers removed
