# Supplementary figures and images for: A within-host infection model to explore tolerance and resistance
Source: eLife journal article supplement (doi:10.7554/elife.104052), 2025-02-13

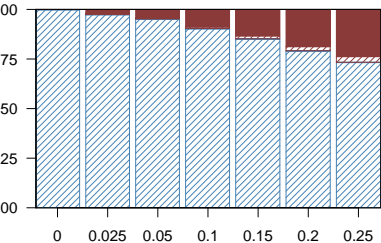

Proportion not killed by infection

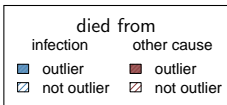

Supplement: supp [file elife-104052-supp-v1.zip]

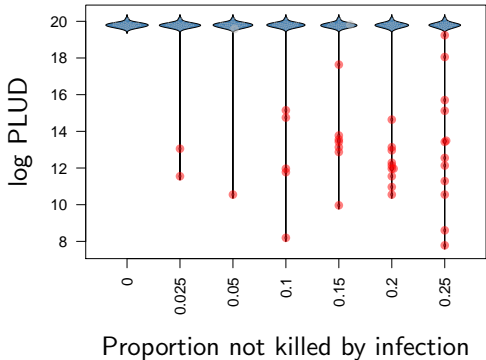

Supplement: supp [file elife-104052-supp-v1.zip]

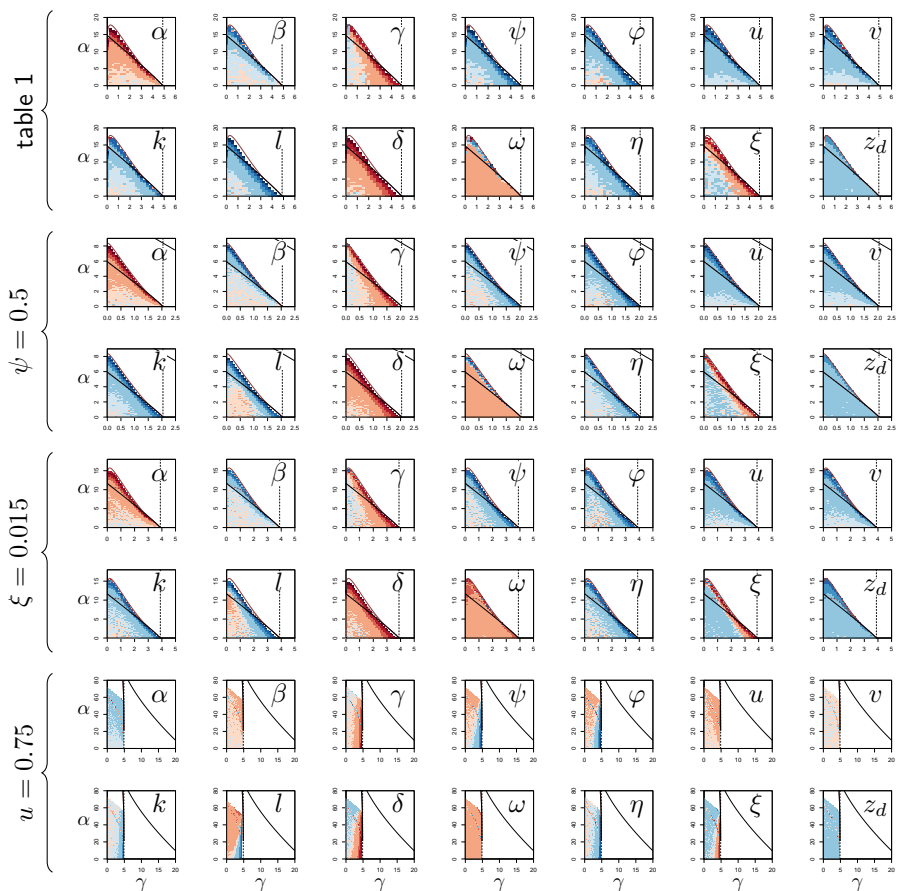

Supplement: supp [file elife-104052-supp-v1.zip]

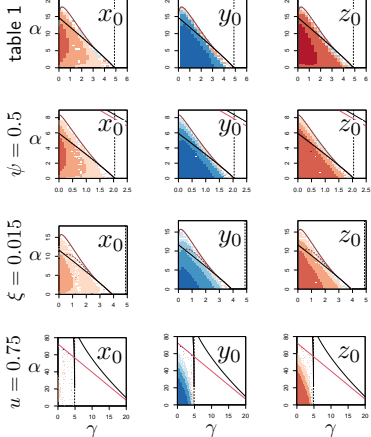

partial derivative of log PLUD  
relative to log initial conditions

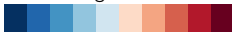

$< -10^{-1}$   
 $< -10^{-2}$   
 $< -10^{-3}$   
 $< -10^{-4}$   
 $< 0$   
 $< 10^{-4}$   
 $< 10^{-3}$   
 $< 10^{-2}$   
 $< 10^{-1}$   
 $> 10^{-1}$

Supplement: supp [file elife-104052-supp-v1.zip]

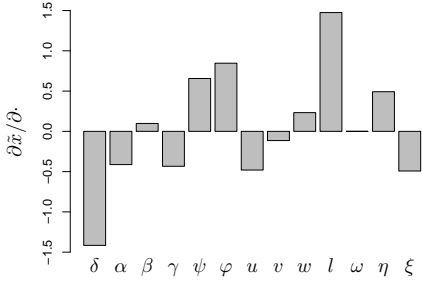

Supplement: supp [file elife-104052-supp-v1.zip]

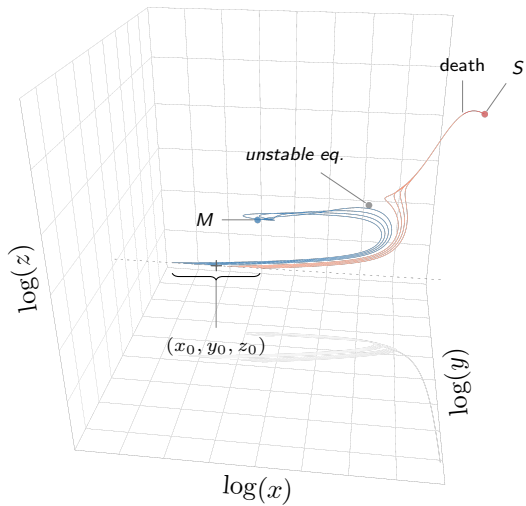

Supplement: supp [file elife-104052-supp-v1.zip]

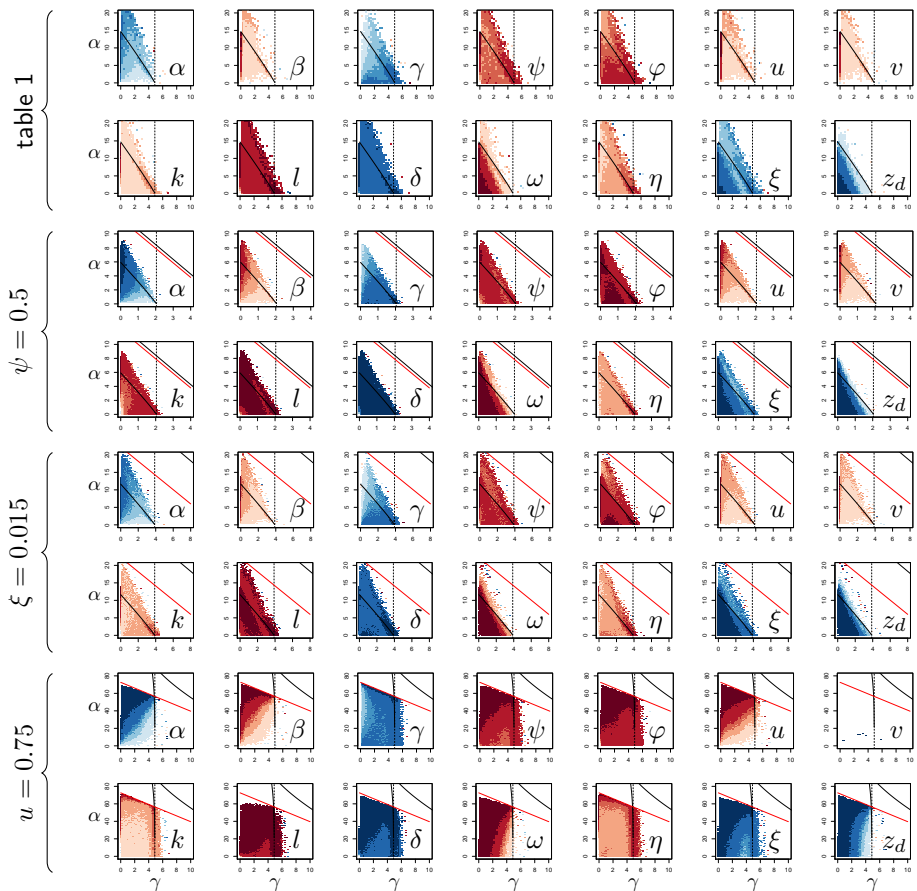

Supplement: supp [file elife-104052-supp-v1.zip]

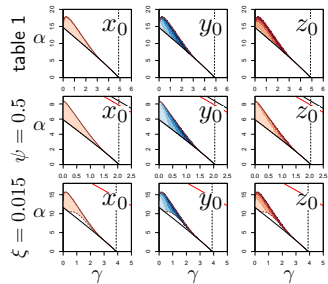

$< -10$   
 $< -5$   
 $< -2.5$   
 $< -1$   
 $< 0$   
 $< 1$   
 $< 2.5$   
 $< 5$   
 $< 10$   
 $\geq 10$

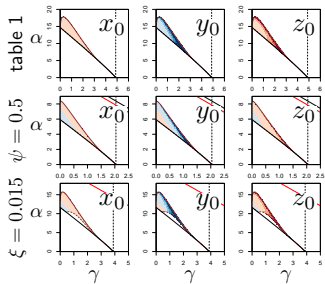

$< -10$   
 $< -7.5$   
 $< -5$   
 $< -2.5$   
 $< 0$   
 $< 2.5$   
 $< 5$   
 $< 7.5$   
 $< 10$   
 $\geq 10$

Supplement: supp [file elife-104052-supp-v1.zip]

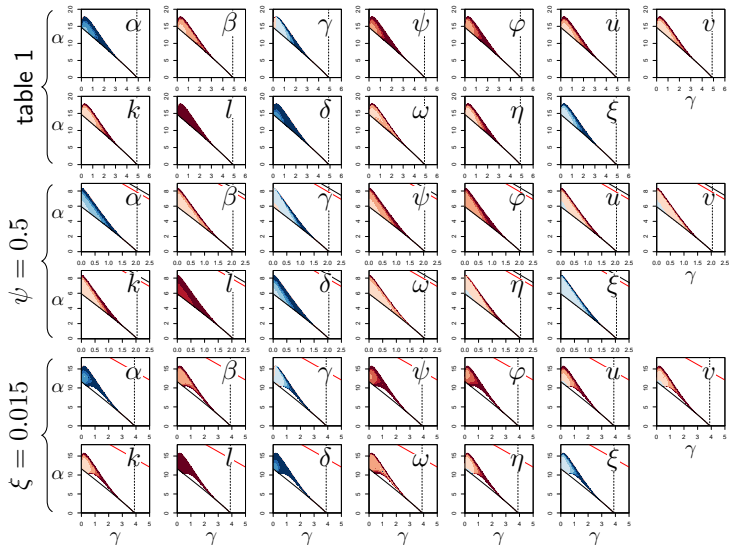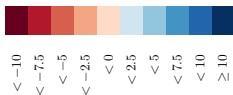

Supplement: supp [file elife-104052-supp-v1.zip]

table 1

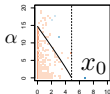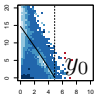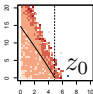 $\psi = 0.5$ 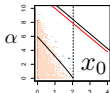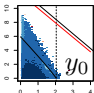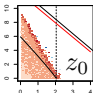 $\xi = 0.0015$ 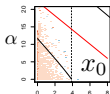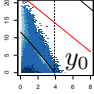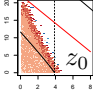 $u = 0.75$ 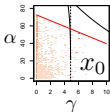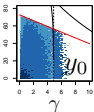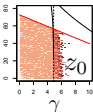

partial derivative of log hazard ratio  
relative to log initial conditions

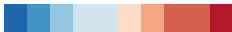 $< -25$  $< -10$  $< -6.67$  $< -3.33$  $< 0$  $< 3.33$  $< 6.67$  $< 10$  $< 25$  $\geq 25$

Supplement: supp [file elife-104052-supp-v1.zip]
